# Supplementary material for: Selective Uptake of Carboxylated Multi-Walled Carbon Nanotubes by Class A Type 1 Scavenger Receptors and Impaired Phagocytosis in Alveolar Macrophages
Source: MDPI journal article supplement (doi:10.3390/nano10122417), 2020-12-03
Supplement: s1 [file s1]

## UPDATE: ACCESSING VIDEO FILES IN FIGURE S2

Supplemental Figure S2 instructs readers to open the videos in panels A and B by clicking the panel. However, this link does not work. Now, videos in Figure S2 A and B are uploaded as standalone files in the Supplemental Material and can be directly opened by clicking on them.
