# Supplementary material for: Selective Uptake of Carboxylated Multi-Walled Carbon Nanotubes by Class A Type 1 Scavenger Receptors and Impaired Phagocytosis in Alveolar Macrophages
Source: Nanomaterials (Basel). 2020 Dec 3;10(12):2417. doi: 10.3390/nano10122417 (PMC7761752; doi:10.3390/nano10122417)
Supplement: Supplementary file 1 [file nanomaterials-10-02417-s001.zip]

Archive with 5 entries (4 files):
- nanomaterials-988389-update SI 2/
- nanomaterials-988389-update SI 2/Figure S2A.wmv
- nanomaterials-988389-update SI 2/Figure S2B.wmv
- nanomaterials-988389-update SI 2/SI-nanomaterials-988389.pdf
- nanomaterials-988389-update SI 2/UPDATE - ACCESSING VIDEO FILES IN FIGURE S2.pdf
